# Supplementary material for: Kinetic condition driven phase and vacancy enhancing thermoelectric performance of low-cost and eco-friendly Cu2−xS
Source: Royal Society of Chemistry journal article supplement (doi:10.1039/c9tc00819e), 2019-01-01
Supplement: c9tc00819e1.pdf [file c9tc00819e1.pdf]

# Kinetic Condition Driven Phase and Vacancy Control Enhancing Thermoelectric Performance of Nano-sized Low-cost and Eco-friendly $\text{Cu}_{2-x}\text{S}$

*Wei-Di Liu,<sup>a</sup> Xiao-Lei Shi,<sup>a</sup> Han Gao,<sup>a</sup> Raza Moshwan,<sup>a</sup> Sheng-Duo Xu,<sup>a</sup> Yuan Wang,<sup>b,a</sup> Lei Yang,<sup>c</sup> Zhi-Gang Chen<sup>b,a,\*</sup> Jin Zou<sup>a,d,\*</sup>*

<sup>a</sup>Materials Engineering, The University of Queensland, Brisbane, Queensland 4072, Australia.

<sup>b</sup>Centre for Future Materials, University of Southern Queensland, Springfield central, Queensland 4300, Australia.

<sup>c</sup>School of Materials Science and Engineering, Sichuan University, Chengdu 610065, China

<sup>d</sup>Centre for Microscopy and Microanalysis, The University of Queensland, Brisbane, Queensland 4072, Australia.

## 1. Experimental details

Material preparation: The  $\text{Cu}_{2-x}\text{S}$  powders were synthesized by a facile solvothermal method. CuO (98%), S (99%), NaOH (97%) and ethylene glycol (99%) were employed as the precursors (purchased from Sigma Aldrich). Detailed synthesis mechanism can be express as:

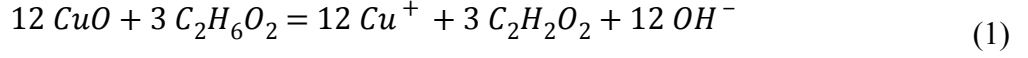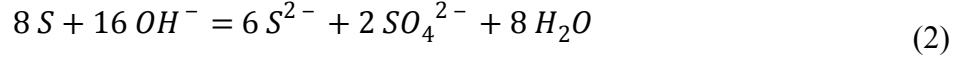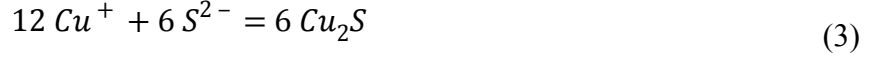

In total, the reaction mechanism can be summarized as:

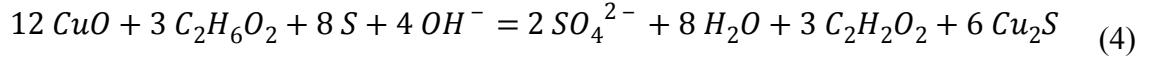

NaOH solution (10 mol L<sup>-1</sup>) was employed to adjust the reaction kinetic condition by changing the acid-base environment. More NaOH can boost the formation of Cu<sub>2-x</sub>S phases. In each synthesis process, 36 ml ethylene glycol and varying amount of NaOH solution (2, 4 and 6 ml) were sufficiently mixed in a 125 ml Teflon container under the stirring speed of 500 r/min. Then, 0.020 mol CuO and 0.016 mol S were added into the solution under continuous stirring. The container was subsequently sealed in a stainless-steel autoclave, heated up to 230 °C, kept for 24 h and slowly cooled to room-temperature. The as-synthesized powders were collected by centrifuging, washed by ethanol and de-ionized water several times and subsequently dried at 60 °C for ~12 h. For performance measurement, as-synthesized powders were sintered into pellets by spark plasma sintering (Fuji-211Lx) under 550 °C for 5 min.

Thermoelectric performance measurement: To identify the electrical performance, the Seebeck coefficient (*S*) and electrical conductivity (*σ*) were measured simultaneously by both ZEM3 (ULVAC) and SBA 458 (NETZSCH). To understand the thermal performance, the total thermal conductivity (*κ*) was calculated based on  $\kappa = \rho \cdot C_p \cdot D$ , where the *ρ*, *C<sub>p</sub>* and *D* are the density, specific heat and thermal diffusivity, respectively. The *ρ* of all bulks were measured by Archimedes method and higher than 98%. The *C<sub>p</sub>* was measured by DSC 404 F3 (NETZSCH). The *D* was measured by both LFA 457 (NETZSCH) and LFA 467 (HyperFlash, NETZSCH). To

understand the carrier transport properties, the  $n_H$  was measured by the van der Pauw technique under a reversible magnetic field of  $\pm 1.5$  T. All thermoelectric performance were measured perpendicular to the pressing direction.

**Table S1.** Measured densities of as-prepared  $\text{Cu}_{2-x}\text{S}$  pellets

| <b>NaOH amount</b> | <b>Density</b>         | <b>Relative density</b> |
|--------------------|------------------------|-------------------------|
| <b>2 ml</b>        | 5.50 g/cm <sup>3</sup> | 98 %                    |
| <b>4 ml</b>        | 5.54 g/cm <sup>3</sup> | 99 %                    |
| <b>6 ml</b>        | 5.55 g/cm <sup>3</sup> | 99 %                    |

Structural Characterization: The room-temperature structural information of as-synthesized bulks were collected by a Bruker D8 advanced powder X-ray diffraction (XRD). Rigaku Smart Lab thin-film and micro-diffraction XRD was employed for In situ heating XRD. Both equipment are equipped with graphite monochromatized Cu K $\alpha$  radiation source ( $\lambda = 0.15408$  nm). The Rietveld refinement (MAUD) was carried out for phase content analysis. The crystal structure was further confirmed by Transmission electron microscopy (Philips Tecnai F20 FEG-S/TEM) on a specimen cut from the sintered pellet ( $\text{Cu}_{2-x}\text{S}$  synthesized with 4 ml NaOH) by Ultramicrotone. The composition was statistically analyzed via both energy dispersive X-ray spectroscopy (EDS, Hitachi SU3500) and electron probe micro-analyzer (EPMA, JXA-8200).

## **2. Single parabolic band model calculation**

Thermoelectric parameters of as-prepared  $\text{Cu}_{2-x}\text{S}$  samples could be calculated based on single parabolic band (SPB) model:<sup>1-3</sup>

$$S(\eta) = \frac{k_B}{e} \cdot \left[ \frac{\left(r + \frac{5}{2}\right) \cdot F_{r + \frac{3}{2}}(\eta)}{\left(r + \frac{3}{2}\right) \cdot F_{r + \frac{1}{2}}(\eta)} - \eta \right] \quad (5)$$

$$n_H = \frac{1}{e \cdot R_H} = \frac{(2m^* \cdot k_B T)^{\frac{3}{2}}}{3\pi^2 \hbar^3} \cdot \frac{\left(r + \frac{3}{2}\right)^2 \cdot F_{r + \frac{1}{2}}(\eta)}{\left(2r + \frac{3}{2}\right) \cdot F_{2r + \frac{1}{2}}(\eta)} \quad (6)$$

$$\mu_H = \left[ \frac{e\pi\hbar^4}{\sqrt{2}(k_B T)^{\frac{3}{2}} E_{def}^{\frac{3}{2}} (m^*)^{\frac{5}{2}}} C_l \right] \frac{\left(2r + \frac{3}{2}\right) \cdot F_{2r + \frac{1}{2}}(\eta)}{\left(r + \frac{3}{2}\right)^2 \cdot F_{r + \frac{1}{2}}(\eta)} \quad (7)$$

$$L = \left(\frac{k_B}{e}\right)^2 \cdot \left( \frac{\left(r + \frac{7}{2}\right) \cdot F_{r + \frac{5}{2}}(\eta)}{\left(r + \frac{3}{2}\right) \cdot F_{r + \frac{1}{2}}(\eta)} - \left[ \frac{\left(r + \frac{5}{2}\right) \cdot F_{r + \frac{3}{2}}(\eta)}{\left(r + \frac{3}{2}\right) \cdot F_{r + \frac{1}{2}}(\eta)} \right]^2 \right) \quad (8)$$

where  $\eta$ ,  $k_B$ ,  $e$ ,  $r$ ,  $R_H$ ,  $m^*$ ,  $\hbar$ ,  $C_l$  and  $E_{def}$  are the reduced Fermi level, the Boltzmann constant, the elementary charge, the carrier scattering factor ( $r = -1/2$  for acoustic phonon scattering),<sup>2</sup> the Hall coefficient, the effective mass, the reduced Plank constant, the elastic constant for longitudinal vibrations and the deformation potential coefficient, respectively. Here  $C_l = v_l^2 \rho$ , where  $v_l = 3711$  m·s<sup>-1</sup> is the longitudinal sound velocity.<sup>4</sup>  $F_i(\eta)$  is the Fermi integral and can be expressed as

$$F_i(\eta) = \int_0^{\infty} \frac{x^i}{1 + e^{(x-\eta)}} dx \quad (9)$$

### 3. Rietveld refinement of room-temperature XRD patterns of as-prepared Cu<sub>2-x</sub>S bulks

To clearly reveal the existence and change of individual Cu<sub>2-x</sub>S phases, enlarged XRD peaks of Cu<sub>2-x</sub>S pellets sintered from powders synthesized with different amount of NaOH are shown in **Figure S1a**. As can be seen, intensity of characteristic peaks of the Cu<sub>2</sub>S reduced with the

reducing amount of NaOH indicating reducing amount of the  $\text{Cu}_2\text{S}$  phase. On the contrary, peak intensity of the  $\text{Cu}_{1.94}\text{S}$  phase has dramatically increased with the reducing amount of NaOH indicating increasing amount of the  $\text{Cu}_{1.94}\text{S}$  phase. Peak intensity of the  $\text{Cu}_{1.96}\text{S}$  phase has obviously increased with the NaOH amount reducing from 6 ml to 4 ml and remains similar when further reducing to 2 ml, this reveals that the amount of  $\text{Cu}_{1.96}\text{S}$  phase has sharply increased while the NaOH amount has reduced from 6 ml to 4 ml and remains one of the major component when the NaOH amount further reduced to 2 ml. This result is closely consistent with the Rietveld refinement result (**Figure 2b**). Additionally, note that the compositional difference between these three phases is quite small. As for this reason, under the same crystal growth condition during the synthesis process, kinetic-condition driven composition change would lead to different formation energy and subsequently changed crystal structure. Hence, composition of the same  $\text{Cu}_{2-x}\text{S}$  phase should be similar.

To analyze the phase contents, Rietveld refinement was carried out. The experimental and calculated patterns are shown in **Figure. S1b**. As can be seen, the calculated and experimental patterns are consistent with each other. The  $R_{wp}$  and  $\chi^2$  values of all samples are smaller than 4.0 and 2, respectively, indicating reliable refinement.

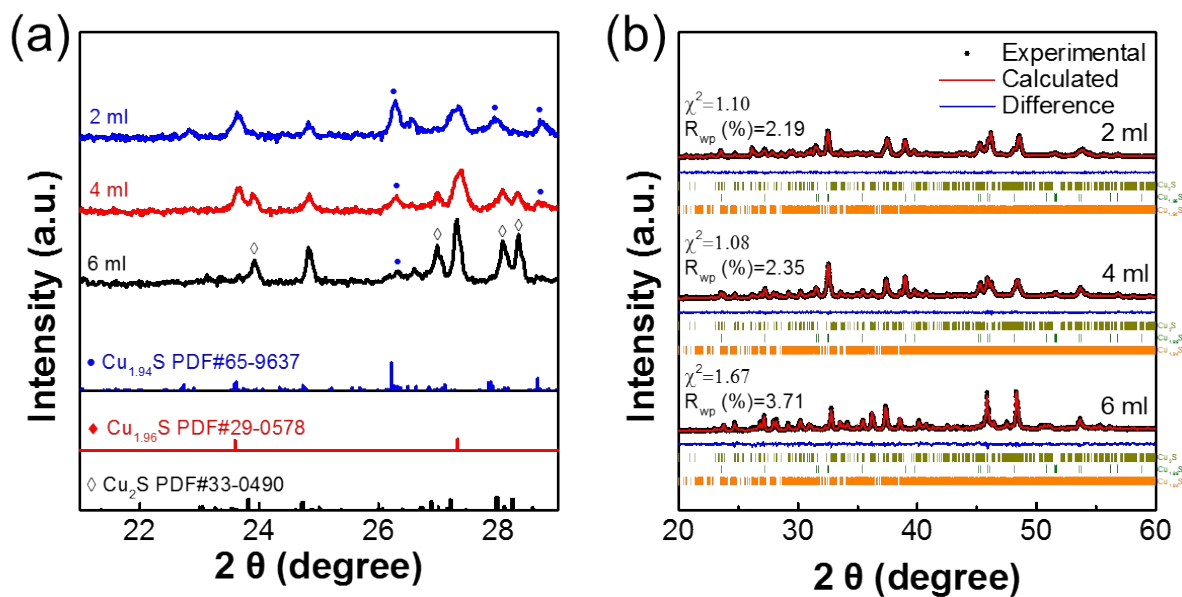

**Figure S1.** (a) Enlarged XRD peaks of the Cu<sub>2-x</sub>S pellets sintered from powders synthesized with 2, 4 and 6 ml NaOH, respectively; (b) Rietveld refinement calculated XRD patterns in comparison with the experimental ones.

#### 4. Lorenz factor of as-prepared Cu<sub>2-x</sub>S pellets

**Figure S2** shows the SPB-calculated Lorenz factor ( $L$ ) of as-prepared Cu<sub>2-x</sub>S pellets. With increasing amount of NaOH, the  $L$  has reduced due to enhanced  $n_H$  (**Figure 3b**).

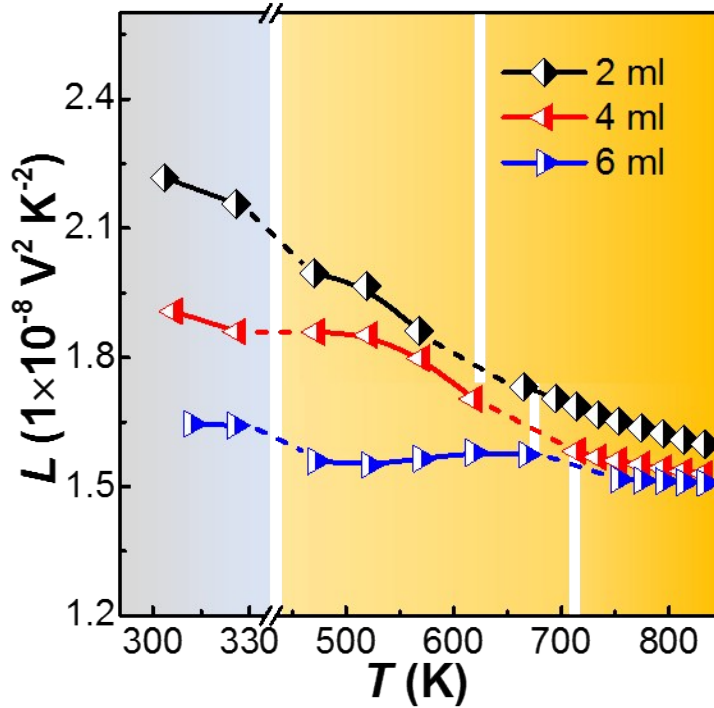

**Figure S2.** The SPB model-calculated Lorenz factor ( $L$ ).

## 5. Influence of reduced phase transition temperature on thermoelectric performance of as-prepared $\text{Cu}_{2-x}\text{S}$

To understand the influence of reduced phase transition temperature on thermoelectric performance,  $\sigma$ ,  $S$ ,  $S^2\sigma$ ,  $\kappa$ , lattice thermal conductivity ( $\kappa_l$ ) and  $zT$  of the  $\text{Cu}_{2-x}\text{S}$  pellet sintered from powders synthesized with 2 ml NaOH were aligned to the given phase transition temperature of 715 K, and shown in **Figure S3** in comparison with the original one. As can be seen from **Figure S3a**, due to early appearance of high-temperature and high-performance cubic  $\text{Cu}_{2-x}\text{S}$  at 630 K rather than 715 K,  $\sigma$  is enhanced when the temperature is below 700 K. Simultaneously,  $\sigma$  above 700 K has dropped. It should be noted that  $\sigma$  below and above 700 K show different trends with reduced phase transition temperature due to different temperature-dependency behaviours before and after the phase transition at  $\sim 700$  K of  $\text{Cu}_{2-x}\text{S}$ . Meanwhile, as

$n_H$  remains nearly temperature-independent (**Figure 3b**), this should be mainly attributed to changed carrier mobility ( $\mu_H$ , **Figure 3c**). The early appearance of cubic  $\text{Cu}_{2-x}\text{S}$  with higher  $S$  at 630 K has also led to the enhanced  $S$  (**Figure S3b**). Due to simultaneously enhanced  $\sigma$  and  $S$  below 700 K, **Figure S3c** shows the enhanced  $S^2\sigma$ . Above 700 K, dominated by enhanced  $S$ ,  $S^2\sigma$  of the  $\text{Cu}_{2-x}\text{S}$  pellets have also been slightly enhanced. Similar to the  $\sigma$  tendency, the reduced phase transition temperature has also led to slightly enhanced  $\kappa$  below 700 K, but reduced  $\kappa$  above 700 K, as shown in **Figure S3d**. The change in  $\kappa$  is dominated by the changed electrical thermal conductivity ( $\kappa_e$ ) as  $\kappa_l$  has no obvious change (**Figure S3e**). Overall, with reducing phase transition temperature,  $zT$  of the  $\text{Cu}_{2-x}\text{S}$  pellet is enhanced (**Figure S3f**).

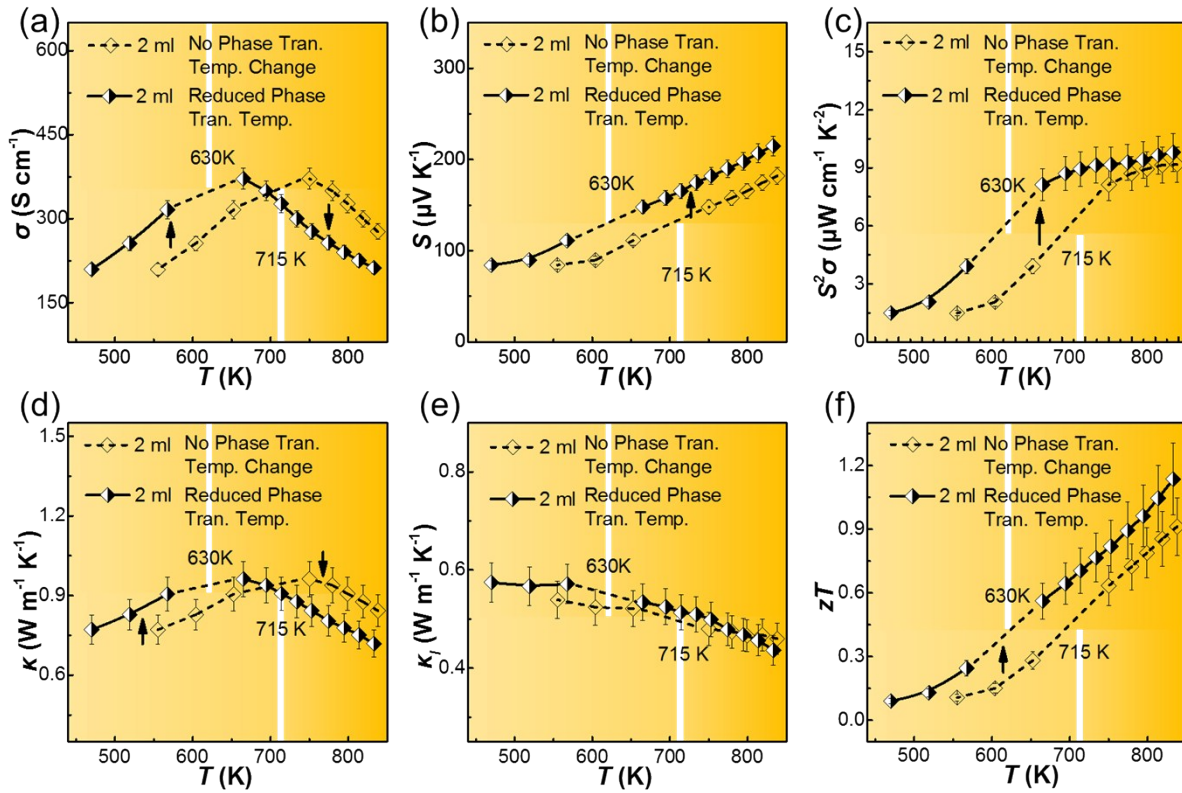

**Figure S3.** The temperature-dependent thermoelectric performance ( $>473$  K) with the phase transition temperature being defined at  $\sim 715$  K in comparison with the true phase transition temperatures (taking the  $\text{Cu}_{2-x}\text{S}$  pellet sintered from powders synthesized with 2 ml NaOH whose



phase transition temperature has reduced to ~630 K in comparison with the 6 ml one), including (a) electrical conductivity ( $\sigma$ ), (b) Seebeck coefficient ( $S$ ), (c) power factor ( $S^2\sigma$ ), (d) total thermal conductivity ( $\kappa$ ), (e) lattice thermal conductivity ( $\kappa_l$ ) and (f) dimensionless figure of merit ( $zT$ ).

## 6. Composition analysis of as-sintered $\text{Cu}_{2-x}\text{S}$ pellets

Detailed electron probe micro-analyzer (EPMA) composition analysis of  $\text{Cu}_{2-x}\text{S}$  pellets sintered from powders synthesized with 2, 4 and 6 ml of NaOH, respectively, are shown in the **Table S2, S3 and S4**. As the composition of three  $\text{Cu}_{2-x}\text{S}$  phases are closely within the error range, they can be hardly identified via composition analysis.

**Table S2.** EPMA measured composition of as-prepared  $\text{Cu}_{2-x}\text{S}$  pellets sintered from powders synthesized with 2 ml NaOH

| Point  | Cu (at. %) | S (at. %) | Total (at. %) | Cu/S     |
|--------|------------|-----------|---------------|----------|
| 2ml-1  | 66.0345    | 33.9655   | 100           | 1.944164 |
| 2ml-2  | 66.1258    | 33.8742   | 100           | 1.952099 |
| 2ml-3  | 66.0468    | 33.9532   | 100           | 1.94523  |
| 2ml-4  | 66.2315    | 33.7685   | 100           | 1.96134  |
| 2ml-5  | 65.9856    | 34.0144   | 100           | 1.939931 |
| 2ml-6  | 66.0345    | 33.9655   | 100           | 1.944164 |
| 2ml-7  | 65.8941    | 34.1059   | 100           | 1.932044 |
| 2ml-8  | 66.3158    | 33.6842   | 100           | 1.968751 |
| 2ml-9  | 66.1795    | 33.8205   | 100           | 1.956787 |
| 2ml-10 | 66.3843    | 33.6157   | 100           | 1.9748   |
| 2ml-11 | 66.3138    | 33.6862   | 100           | 1.968575 |
| 2ml-12 | 65.9057    | 34.0943   | 100           | 1.933042 |
| 2ml-13 | 66.2844    | 33.7156   | 100           | 1.965986 |
| 2ml-14 | 66.3157    | 33.6843   | 100           | 1.968742 |
| 2ml-15 | 66.2098    | 33.7902   | 100           | 1.959438 |
| 2ml-16 | 66.2871    | 33.7129   | 100           | 1.966224 |
| 2ml-17 | 66.1053    | 33.8947   | 100           | 1.950314 |
| 2ml-18 | 66.2337    | 33.7663   | 100           | 1.961533 |
| 2ml-19 | 66.0567    | 33.9433   | 100           | 1.94609  |

|                |          |          |     |          |
|----------------|----------|----------|-----|----------|
| <b>2ml-20</b>  | 65.9317  | 34.0683  | 100 | 1.93528  |
| <b>average</b> | 66.14382 | 33.85619 | 100 | 1.953727 |

**Table S3.** EPMA measured composition of as-prepared  $\text{Cu}_{2-x}\text{S}$  pellets sintered from powders synthesized with 4 ml NaOH

| <b>Point</b>   | <b>Cu (at. %)</b> | <b>S (at. %)</b> | <b>Total (at. %)</b> | <b>Cu/S</b> |
|----------------|-------------------|------------------|----------------------|-------------|
| 4ml-1          | 66.3528           | 33.6472          | 100                  | 1.972016    |
| 4ml-2          | 66.0513           | 33.9487          | 100                  | 1.945621    |
| 4ml-3          | 66.0358           | 33.9642          | 100                  | 1.944277    |
| 4ml-4          | 66.6432           | 33.3568          | 100                  | 1.997889    |
| 4ml-5          | 66.2251           | 33.7749          | 100                  | 1.960779    |
| 4ml-6          | 66.4384           | 33.5616          | 100                  | 1.979596    |
| 4ml-7          | 66.2272           | 33.7728          | 100                  | 1.960963    |
| 4ml-8          | 65.9841           | 34.0159          | 100                  | 1.939802    |
| 4ml-9          | 66.3586           | 33.6414          | 100                  | 1.972528    |
| 4ml-10         | 66.5532           | 33.4468          | 100                  | 1.989823    |
| 4ml-11         | 66.0631           | 33.9369          | 100                  | 1.946645    |
| 4ml-12         | 66.5271           | 33.4729          | 100                  | 1.987491    |
| 4ml-13         | 66.4198           | 33.5802          | 100                  | 1.977945    |
| 4ml-14         | 66.2366           | 33.7634          | 100                  | 1.961787    |
| 4ml-15         | 66.0574           | 33.9426          | 100                  | 1.94615     |
| 4ml-16         | 65.9135           | 34.0865          | 100                  | 1.933713    |
| 4ml-17         | 67.2818           | 32.7182          | 100                  | 2.056403    |
| 4ml-18         | 66.4795           | 33.5205          | 100                  | 1.983249    |
| 4ml-19         | 66.5354           | 33.4646          | 100                  | 1.988232    |
| 4ml-20         | 66.3682           | 33.6318          | 100                  | 1.973376    |
| <b>average</b> | 66.33761          | 33.6624          | 100                  | 1.970914    |

| Point  | Cu %    | S %     | Total % | Cu/S     |
|--------|---------|---------|---------|----------|
| 4ml-1  | 66.3528 | 33.6472 | 100     | 1.972016 |
| 4ml-2  | 66.0513 | 33.9487 | 100     | 1.945621 |
| 4ml-3  | 66.0358 | 33.9642 | 100     | 1.944277 |
| 4ml-4  | 66.6432 | 33.3568 | 100     | 1.997889 |
| 4ml-5  | 66.2251 | 33.7749 | 100     | 1.960779 |
| 4ml-6  | 66.4384 | 33.5616 | 100     | 1.979596 |
| 4ml-7  | 66.2272 | 33.7728 | 100     | 1.960963 |
| 4ml-8  | 65.9841 | 34.0159 | 100     | 1.939802 |
| 4ml-9  | 66.3586 | 33.6414 | 100     | 1.972528 |
| 4ml-10 | 66.5532 | 33.4468 | 100     | 1.989823 |
| 4ml-11 | 66.0631 | 33.9369 | 100     | 1.946645 |
| 4ml-12 | 66.5271 | 33.4729 | 100     | 1.987491 |
| 4ml-13 | 66.4198 | 33.5802 | 100     | 1.977945 |

|         |          |         |     |          |
|---------|----------|---------|-----|----------|
| 4ml-14  | 66.2366  | 33.7634 | 100 | 1.961787 |
| 4ml-15  | 66.0574  | 33.9426 | 100 | 1.94615  |
| 4ml-16  | 65.9135  | 34.0865 | 100 | 1.933713 |
| 4ml-17  | 67.2818  | 32.7182 | 100 | 2.056403 |
| 4ml-18  | 66.4795  | 33.5205 | 100 | 1.983249 |
| 4ml-19  | 66.5354  | 33.4646 | 100 | 1.988232 |
| 4ml-20  | 66.3682  | 33.6318 | 100 | 1.973376 |
| average | 66.33761 | 33.6624 | 100 | 1.970914 |

**Table S4.** EPMA measured composition of as-prepared  $\text{Cu}_{2-x}\text{S}$  pellets sintered from powders synthesized with 6 ml NaOH

| Point   | Cu %     | S %      | Total % | Cu/S     |
|---------|----------|----------|---------|----------|
| 6ml-1   | 66.3596  | 33.6404  | 100     | 1.972616 |
| 6ml-2   | 66.5878  | 33.4122  | 100     | 1.992919 |
| 6ml-3   | 66.4591  | 33.5409  | 100     | 1.981435 |
| 6ml-4   | 66.5755  | 33.4245  | 100     | 1.991817 |
| 6ml-5   | 66.5283  | 33.4717  | 100     | 1.987598 |
| 6ml-6   | 66.4713  | 33.5287  | 100     | 1.982519 |
| 6ml-7   | 66.6905  | 33.3095  | 100     | 2.002147 |
| 6ml-8   | 66.4188  | 33.5812  | 100     | 1.977857 |
| 6ml-9   | 66.5271  | 33.4729  | 100     | 1.987491 |
| 6ml-10  | 66.6281  | 33.3719  | 100     | 1.996533 |
| 6ml-11  | 66.5198  | 33.4802  | 100     | 1.98684  |
| 6ml-12  | 66.5384  | 33.4616  | 100     | 1.9885   |
| 6ml-13  | 66.6971  | 33.3029  | 100     | 2.002742 |
| 6ml-14  | 66.4315  | 33.5685  | 100     | 1.978983 |
| 6ml-15  | 66.4952  | 33.5048  | 100     | 1.984647 |
| 6ml-16  | 66.5795  | 33.4205  | 100     | 1.992175 |
| 6ml-17  | 66.6312  | 33.3688  | 100     | 1.996811 |
| 6ml-18  | 66.4058  | 33.5942  | 100     | 1.976704 |
| 6ml-19  | 66.4792  | 33.5208  | 100     | 1.983222 |
| 6ml-20  | 66.459   | 33.541   | 100     | 1.981426 |
| average | 66.52414 | 33.47586 | 100     | 1.987249 |

## Reference

1. Y. Xu, W. Li, C. Wang, J. Li, Z. Chen, S. Lin, Y. Chen and Y. Pei, *J. Mater. Chem. A*, 2017, **5**, 19143-19150.
2. J. Shen, Z. Chen, S. lin, L. Zheng, W. Li and Y. Pei, *J. Mater. Chem. C*, 2016, **4**, 209-214.

3. X. She, X. Su, H. Du, T. Liang, G. Zheng, Y. Yan, R. Akram, C. Uher and X. Tang, *J. Mater. Chem. C*, 2015, **3**, 12116-12122.
4. Y. He, T. Day, T. Zhang, H. Liu, X. Shi, L. Chen and G. J. Snyder, *Adv. Mater.*, 2014, **26**, 3974-3978.
